# Supplementary material for: Analysis of Mammalian Cell Proliferation and Macromolecule Synthesis Using Deuterated Water and Gas Chromatography-Mass Spectrometry
Source: PubMed Central journal article supplement (PMC5192440; doi:10.3390/metabo6040034), 2016-10-13
Supplement: metabolites-06-00034-s001.pdf [file metabolites-06-00034-s001.pdf]

# Supplementary Materials: Analysis of Mammalian Cell Proliferation and Macromolecule Synthesis Using Deuterated Water and Gas Chromatography-Mass Spectrometry

Victoria C. Foletta, Michelle Palmieri, Joachim Kloehn, Shaun Mason, Stephen F. Previs, Malcolm J. McConville, Oliver M. Sieber, Clinton R. Bruce and Greg M. Kowalski

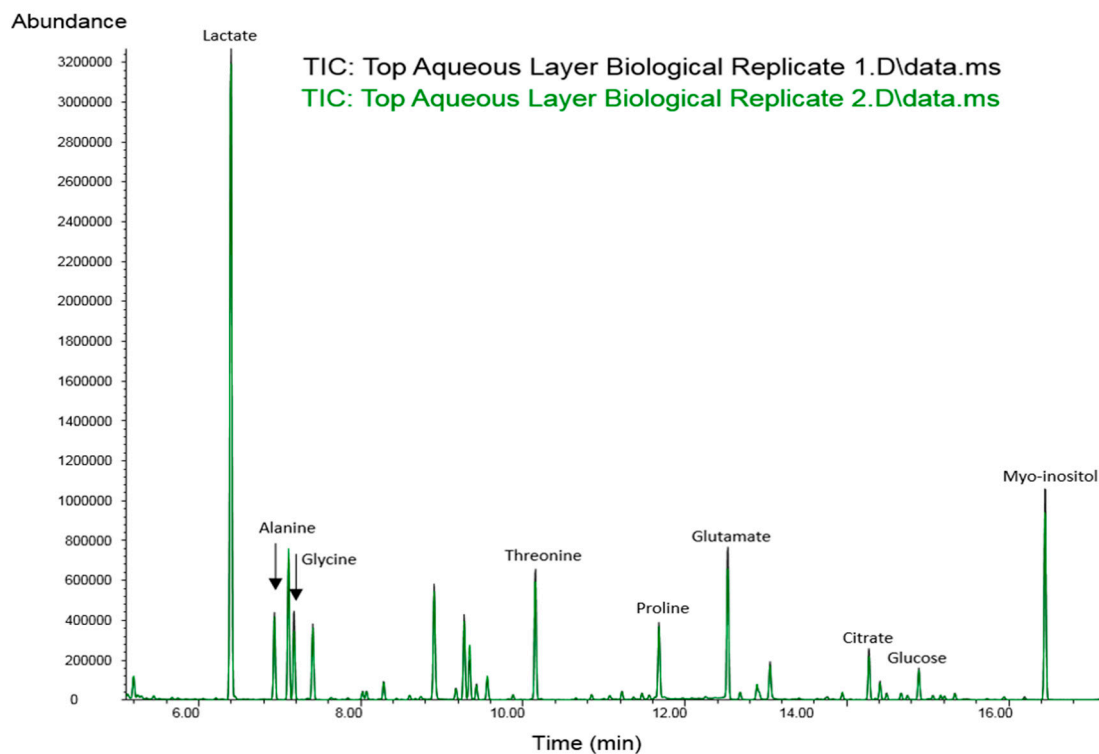

**Figure S1.** Total ion chromatogram (TIC) of the top aqueous layer generated using the described biphasic extraction procedure. Two biological replicates from C2C12 myoblasts were analysed via GC-MS using the MOX-TMS derivatizing strategy, confirming the presence of polar intracellular metabolites.
